# Supplementary material for: Inhibition of post-termination ribosome recycling at premature termination codons in UPF1 ATPase mutants
Source: eLife. 2020 Jul 22;9:e57834. doi: 10.7554/eLife.57834 (PMC7375815; doi:10.7554/eLife.57834)
Supplement: Supplementary file 1. [file elife-57834-supp1.xlsx]

## Sheet: Sheet1
SUPPLEMENTAL FILE 1: YEAST STRAINS USED IN THIS STUDY
Name	Genotype	Notes
yKB146	MATa, ura3, leu2, his3, met15, upf1::KanMX	upf1Δ
yKB154	MATa, ura3, leu2, his3, met15	Wild-type
yKB709	MATa, ura3, leu2, his3, met15, RPL16A-ZZ-HIS3 upf1::KanMX	ZZ-tagged RPL16A in upf1Δ background
yKB761	MATa, ura3, leu2, his3, met15, UPF1-DE572AA	ATPase-deficient UPF1 expressed from chromosomal locus
yKB762	MATa, ura3, leu2, his3, met15, HIS3-PGAL1-3HA-SUP45 upf1::KanMX	HA tagged SUP45 under control of GAL1 promoter in upf1Δ background
yKB782	MATa, ura3, leu2, his3, met15, RPS13-HA-HIS3 upf1::KanMX	HA-tagged RPS13 in upf1Δ background
