# Supplementary material for: Inhibition of post-termination ribosome recycling at premature termination codons in UPF1 ATPase mutants
Source: eLife. 2020 Jul 22;9:e57834. doi: 10.7554/eLife.57834 (PMC7375815; doi:10.7554/eLife.57834)
Supplement: Supplementary file 2. [file elife-57834-supp2.xlsx]

## Sheet: Sheet1
SUPPLEMENTAL FILE 2: PLASMIDS USED IN THIS STUDY
Name	Description	Notes
pFA6a-His3MX6-PGAL1-3HA	Cassette used for tagging and placing SUP45 under control of GAL promoter	Longtine et al. Yeast, 1998
pKB323	GAL-GFP-PTC 67-ΔA; URA3, CEN
pKB324	GAL-GFP-PTC 67-ΔB; URA3, CEN
pKB510	TDH3-GFP-PTC 135; URA3, CEN
pKB556	UPF1-HA; LEU2, CEN	HA-tagged UPF1 (wildtype). Used as mutagenesis template to generate plasmids encoding mutant upf1 alleles.
pKB576	UPF1-HA-DE572AA; LEU2, CEN
pKB578	UPF1-HA-K436E; LEU2, CEN
pKB579	UPF1-HA-RR793AA; LEU2, CEN
pKB673	TDH3-GFP-PTC 67; URA3, CEN
pKB674	TDH3-GFP-PTC 125; URA3; CEN	GFP with PTC at codon 125; used as mutagenesis template for plasmids encoding PTC 125 variants.
pKB682	TDH3-GFP-PTC 125-stop	Third codon downstream of PTC mutated to stop codon
pKB683	TDH3-GFP-PTC 125-stop+1	Third codon downstream of PTC in +1 frame mutated to stop codon
pKB684	TDH3-GFP-PTC 125-stop+2	Third codon downstream of PTC in +2 frame mutated to stop codon
pKB698	UPF1-HA-Q601A; LEU2, CEN
pKB699	UPF1-HA-R639A; LEU2, CEN
pKB700	TDH3-GFP-PTC 125-FLAG; URA3; CEN	Sequence beginning at 10th nt downstream of PTC replaced with FLAG sequence (in frame with GFP)
pKB701	TDH3-GFP-PTC 125-FLAG+1; URA3; CEN	Sequence beginning at 11th nt downstream of PTC replaced with FLAG sequence (+1 frame relative to GFP)
pKB702	TDH3-GFP-PTC 125-FLAG+2; URA3; CEN	Sequence beginning at 12th nt downstream of PTC replaced with FLAG sequence (+2 frame relative to GFP)
pKB703	TDH3-GFP-PTC 125 +1; URA3, CEN	Single nt insertion immediately after PTC at 125
pKB704	TDH3-GFP PTC 135 +1; URA3, CEN	Single nt insertion immediately after PTC at 135
pKB716	TDH3-GFP-PTC 125-A124	Last codon before PTC mutated to AAA
pKB717	TDH3-GFP-PTC 125-C124	Last codon before PTC mutated to GGG
pKB718	TDH3-GFP-PTC 125-G124	Last codon before PTC mutated to CCC
pKB719	TDH3-GFP-PTC 125-T124	Last codon before PTC mutated to TTT
pKB724	TDH-GFP-PTC 125-A33T	33rd nt downstream of PTC mutated from A to T
pKB741	UPF1-HA-T437A; LEU2, CEN
pKB742	UPF1-HA-Y638A; LEU2, CEN
pKB743	UPF1-HA-E769A; LEU2, CEN
pKB744	UPF1-HA-R801A; LEU2, CEN
pKB745	UPF1-HA-DE572KK; LEU2, CEN
pKB746	UPF1-HA-DE572NQ; LEU2, CEN
pKB747	UPF1-HA-Q601K; LEU2, CEN
pKB748	UPF1-HA-V438A; LEU2, CEN
pKB749	UPF1-HA-Q766A; LEU2, CEN
pKB752	UPF1-HA-Q413A; LEU2, CEN
pKB753	UPF1-HA-Q766K; LEU2, CEN
pKB754	UPF1-HA-E769K; LEU2, CEN
pKB761	TDH-GFP-PTC 125-UAG; URA3, CEN	PTC mutated from UAA to UAG
pKB762	TDH-GFP-PTC 125-UGA; URA3, CEN	PTC mutated from UAA to UGA
pKB763	TDH-GFP-PTC 125-C36G	36th nt downstream of PTC mutated from C to G
pKB787	TDH-GFP-PTC 125-d3	Deletion of 3 nt downstream of the PTC
pKB788	TDH-GFP-PTC 125-d6	Deletion of 6 nt downsltream of the PTC
pKB796	TDH-GFP-PTC 125-A17C	17th nt downstream of PTC mutated from A to C
pKB797	TDH-GFP-PTC 125-T20A	20th nt downstream of PTC mutated from T to A
pKB798	TDH-GFP-PTC 125-G28C	28th nt downstream of PTC mutated from G to C
pKB799	TDH-GFP-PTC 125-A29T	29th nt downstream of PTC mutated from A to T
pKB800	TDH-GFP-PTC 125-T30A	30th nt downstream of PTC mutated from T to A
pKB801	TDH-GFP-PTC 125-G31C	31st nt downstream of PTC mutated from G to C
pKB802	TDH-GFP-PTC 125-G32C	32nd nt downstream of PTC mutated from G to C
pKB803	TDH-GFP-PTC 125-A34T	34th nt downstream of PTC mutated from A to T
pKB804	TDH-GFP-PTC 125-A37T	37th nt downstream of PTC mutated from A to T
pKB805	TDH-GFP-PTC 125-T39A	39nt nt downstream of PTC mutated from T to A
pKB808	TDH-GFP-PTC 125-d12	Deletion of 12 nt downsltream of the PTC
pKB812	TDH-GFP-PTC 125-A35T	35th nt downstream of PTC mutated from A to T
pKB813	TDH-GFP-PTC 125-T38A	38th nt downstream of PTC mutated from T to A
pKB814	TDH-GFP-PTC 125-d9	Deletion of 9 nt downsltream of the PTC
pKB823	TDH-GFP-PTC 125-G25C	25th nt downstream of PTC muated from G to C
pKB824	TDH-GFP-PTC 125-d15	Deletion of 15 nt downstream of the PTC
pKB828	TDH-GFP-PTC 125-A26T	26th nt downstream of PTC muated from A to T
pKB829	TDH-GFP-PTC 125-A27T	27th nt downstream of PTC muated from A to T
pKB835	TDH-GFP-PTC 125-d18	Deletion of 18 nt downstream of the PTC
