# Supplementary material for: Inhibition of post-termination ribosome recycling at premature termination codons in UPF1 ATPase mutants
Source: eLife. 2020 Jul 22;9:e57834. doi: 10.7554/eLife.57834 (PMC7375815; doi:10.7554/eLife.57834)
Supplement: Supplementary file 3. [file elife-57834-supp3.xlsx]

## Sheet: Sheet1
SUPPLEMENTAL FILE 3: OLIGONUCLEOTIDES USED IN THIS STUDY
Name	Sequence (5' to 3')	Notes
oKB132	GGGCAGATTGTGTGGACAGGTAATGGTTGTCTGG	RT primer for primer extension of GFP-PTC125 and GFP-PTC135
oKB245	GGCCAACACTTGTCACTACTTTCACTTAAGGTGTTCAGTGCTTTTCAAGATACCCGGATC	Forward mutagenesis primer for inserting PTC at codon 67 of GFP mRNA
oKB246	GGCCAACACTTGTCACTACTTTCACTTAAGGTGTTCAGTGCTTTTCAAGATACCCGGATC	Reverse mutagenesis primer for inserting PTC at codon 67 of GFP mRNA
oKB227	GAGTTAAAAGGTATTGATTTTAAAGAAGATTAAAACATTCTTGGGCACAAATTGGAATAC	Forward mutagenesis primer for inserting PTC at codon 135 of GFP mRNA
oKB228	GTATTCCAATTTGTGCCCAAGAATGTTTTAATCTTCTTTAAAATCAATACCTTTTAACTC	Reverse mutagenesis primer for inserting PTC at codon 135 of GFP mRNA
oKB397	CCACCAGGTGTTTTCGAATTCTAAAAGTTCGCTGCTGGTACTAAGG	Forward mutagenesis primer for inserting PTC at codon 344 of PGK1 mRNA
oKB398	CCTTAGTACCAGCAGCGAACTTTTAGAATTCGAAAACACCTGGTGG	Reverse mutagenesis primer for inserting PTC at codon 344 of PGK1 mRNA
oKB434	GAATTCGTGACGACGCGTAAGCTTGTC GACTTAGCAGCCAGATCCTTTGTATAG	GFP oligo probe
oKB823	ACTAAATTTAGGACTGTGTTAATTGCTGCAAGTACTCAAGCTTCTGAGCCGG	Forward mutagenesis primer for UPF1-DE572AA mutation
oKB824	CCGGCTCAGAAGCTTGAGTACTTGCAGCAATTAACACAGTCCTAAATTTAGT	Reverse mutagenesis primer for UPF1-DE572AA mutation
oKB825	AATTCAAGGCCCACCAGGCACTGGTGAAACAGTTACTTCAGCAACGATTG	Forward mutagenesis primer for UPF1-K436E mutation
oKB826	CAATCGTTGCTGAAGTAACTGTTTCACCAGTGCCTGGTGGGCCTTGAATT	Reverse mutagenesis primer for UPF1-K436E mutation
oKB827	AATGGTTTCTTACGTGATCCTGCTGCTCTAAACGTGGGTCTAACCCGTGC	Forward mutagenesis primer for UPF1-RR793AA mutation
oKB828	GCACGGGTTAGACCCACGTTTAGAGCAGCAGGATCACGTAAGAAACCAAT	Reverse mutagenesis primer for UPF1-RR793AA mutation
oKB1187	ttcatttcggcttgtctccttattaagactacagaaatagacaaaggaaatacttcaataGAATTCGAGCTCGTTTAAAC	Forward PCR primer used for amplification of 3HA-GAL1 from pFA6a-His3MX6-PGAL1-3HA, with gene specific sequences for SUP45
oKB1188	AGATTGGACCAACTTCTTGACCTTCCAGATCTCAATATTTTTTTCAACCTCGTTATCCATgcactgagcagcgtaatctg	Reverse PCR primer used for amplification of 3HA-GAL1 from pFA6a-His3MX6-PGAL1-3HA, with gene specific sequences for SUP45
oKB1269	GATACCCTTGTTAATAGAATCtaaGAGTTAAAAGGTATTGATTTT	Forward mutagenesis primer for inserting PTC at codon 125 of GFP ORF
oKB1270	AAAATCAATACCTTTTAACTCttaGATTCTATTAACAAGGGTATC	Reverse mutagenesis primer for inserting PTC at codon 125 of GFP ORF
oKB1304	CTTGTTAATAGAATCTAAGAGTTAtaaGGTATTGATTTTAAAGAAGAT	Forward mutagenesis primer for inserting a second stop codon 3 codons downstream of PTC 125 in GFP. In frame with PTC
oKB1305	ATCTTCTTTAAAATCAATACCttaTAACTCTTAGATTCTATTAACAAG	Reverse mutagenesis primer for inserting a second stop codon 3 codons downstream of PTC 125 in GFP. In frame with PTC
oKB1306	CTTGTTAATAGAATCTAAGAGTTAGtaaGTATTGATTTTAAAGAAGAT	Forward mutagenesis primer for inserting a second stop codon 3 codons downstream of PTC 125 in GFP. +1 frame relative to PTC
oKB1307	ATCTTCTTTAAAATCAATACttaCTAACTCTTAGATTCTATTAACAAG	Reverse mutagenesis primer for inserting a second stop codon 3 codons downstream of PTC 125 in GFP. +1 frame relative to PTC
oKB1308	CTTGTTAATAGAATCTAAGAGTTAGGtaaTATTGATTTTAAAGAAGAT	Forward mutagenesis primer for inserting a second stop codon 3 codons downstream of PTC 125 in GFP. +2 frame relative to PTC
oKB1309	ATCTTCTTTAAAATCAATAttaCCTAACTCTTAGATTCTATTAACAAG	Reverse mutagenesis primer for inserting a second stop codon 3 codons downstream of PTC 125 in GFP. +2 frame relative to PTC
oKB1344	CTTGTTGGTGATCACCAGGCACTGGGCCCAGTCATATTG	Forward mutagenesis primer for UPF1-Q601A mutation
oKB1345	CAATATGACTGGGCCCAGTGCCTGGTGATCACCAACAAG	Reverse mutagenesis primer for UPF1-Q601A mutation
oKB1346	CGTTTGGAAGTTCAATACGCCATGAATCCTTATTTGAGTG	Forward mutagenesis primer for UPF1-R639A mutation
oKB1347	CACTCAAATAAGGATTCATGGCGTATTGAACTTCCAAACG	Reverse mutagenesis primer for UPF1-R639A mutation
oKB1356	ACCCTTGTTAATAGAATCTAAGAGTTAAAAatggactacaaggacgacgacgacaagAACATTCTTGGGCACAAATTGGAATACAAC	Forward mutagenesis primer to replace sequence beginning 3 codons downstream of PTC 125 in GFP with AUG-FLAG sequence
oKB1357	GTTGTATTCCAATTTGTGCCCAAGAATGTTcttgtcgtcgtcgtccttgtagtccatTTTTAACTCTTAGATTCTATTAACAAGGGT	Reverse mutagenesis primer to replace sequence beginning 3 codons downstream of PTC 125 in GFP with AUG-FLAG sequence
oKB1358	ACCCTTGTTAATAGAATCTAAGAGTTAAAAGatggactacaaggacgacgacgacaagAACATTCTTGGGCACAAATTGGAATACAAC	Forward mutagenesis primer to replace sequence beginning 3 codons downstream of PTC 125 in GFP with AUG-FLAG sequence (+1 frame)
oKB1359	GTTGTATTCCAATTTGTGCCCAAGAATGTTcttgtcgtcgtcgtccttgtagtccatCTTTTAACTCTTAGATTCTATTAACAAGGGT	Reverse mutagenesis primer to replace sequence beginning 3 codons downstream of PTC 125 in GFP with AUG-FLAG sequence (+1 frame)
oKB1360	ACCCTTGTTAATAGAATCTAAGAGTTAAAAGGatggactacaaggacgacgacgacaagAACATTCTTGGGCACAAATTGGAATACAAC	Forward mutagenesis primer to replace sequence beginning 3 codons downstream of PTC 125 in GFP with AUG-FLAG sequence (+2 frame)
oKB1361	GTTGTATTCCAATTTGTGCCCAAGAATGTTcttgtcgtcgtcgtccttgtagtccatCCTTTTAACTCTTAGATTCTATTAACAAGGGT	Reverse mutagenesis primer to replace sequence beginning 3 codons downstream of PTC 125 in GFP with AUG-FLAG sequence (+2 frame)
oKB1362	ACCCTTGTTAATAGAATCTAAtGAGTTAAAAGGTATTGATTTT	Forward mutagenesis primer to insert 1 nt immediately downstream of PTC 125 in GFP
oKB1363	AAAATCAATACCTTTTAACTCaTTAGATTCTATTAACAAGGGT	Reverse mutagenesis primer to insert 1 nt immediately downstream of PTC 125 in GFP
oKB1364	ATTGATTTTAAAGAAGATTAAcAACATTCTTGGGCACAAATTG	Forward mutagenesis primer to insert 1 nt immediately downstream of PTC 135 in GFP
oKB1365	CAATTTGTGCCCAAGAATGTTgTTAATCTTCTTTAAAATCAAT	Reverse mutagenesis primer to insert 1 nt immediately downstream of PTC 135 in GFP
oKB1382	GGTGATACCCTTGTTAATAGAaaaTAAGAGTTAAAAGGTATTGAT	Forward mutagenesis primer to mutate codon 124 of GFP-PTC 125 to AAA
oKB1383	ATCAATACCTTTTAACTCTTAtttTCTATTAACAAGGGTATCACC	Reverse mutagenesis primer to mutate codon 124 of GFP-PTC 125 to AAA
oKB1384	GGTGATACCCTTGTTAATAGAcccTAAGAGTTAAAAGGTATTGAT	Forward mutagenesis primer to mutate codon 124 of GFP-PTC 125 to CCC
oKB1385	ATCAATACCTTTTAACTCTTAgggTCTATTAACAAGGGTATCACC	Reverse mutagenesis primer to mutate codon 124 of GFP-PTC 125 to CCC
oKB1386	GGTGATACCCTTGTTAATAGAgggTAAGAGTTAAAAGGTATTGAT	Forward mutagenesis primer to mutate codon 124 of GFP-PTC 125 to GGG
oKB1387	ATCAATACCTTTTAACTCTTAcccTCTATTAACAAGGGTATCACC	Reverse mutagenesis primer to mutate codon 124 of GFP-PTC 125 to GGG
oKB1388	GGTGATACCCTTGTTAATAGAtttTAAGAGTTAAAAGGTATTGAT	Forward mutagenesis primer to mutate codon 124 of GFP-PTC 125 to TTT
oKB1389	ATCAATACCTTTTAACTCTTAaaaTCTATTAACAAGGGTATCACC	Reverse mutagenesis primer to mutate codon 124 of GFP-PTC 125 to TTT
oKB1428	GCACAATTAAACTCATCCGCTTCGAACGCTGTTAGTCATG	Forward mutagenesis primer for UPF1-Q413A mutation
oKB1429	CATGACTAACAGCGTTCGAAGCGGATGAGTTTAATTGTGC	Reverse mutagenesis primer for UPF1-Q413A mutation
oKB1430	CCACCAGGCACTGGTAAAGCCGTTACTTCAGCAACGATTG	Forward mutagenesis primer for UPF1-T437A mutation
oKB1431	CAATCGTTGCTGAAGTAACGGCTTTACCAGTGCCTGGTGG	Reverse mutagenesis primer for UPF1-T437A mutation
oKB1432	CCAGGCACTGGTAAAACAGCAACTTCAGCAACGATTGTG	Forward mutagenesis primer for UPF1-V438A mutation
oKB1433	CACAATCGTTGCTGAAGTTGCTGTTTTACCAGTGCCTGG	Reverse mutagenesis primer for UPF1-V438A mutation
oKB1434	GATTCGTTTGGAAGTTCAAGCCCGTATGAATCCTTATTTG	Forward mutagenesis primer for UPF1-Y638A mutation
oKB1435	CAAATAAGGATTCATACGGGCTTGAACTTCCAAACGAATC	Reverse mutagenesis primer for UPF1-Y638A mutation
oKB1436	GCCTCAGTTGATGCATTCGCGGGTCGTGAAAAGGATTAC	Forward mutagenesis primer for UPF1-Q766A mutation
oKB1437	GTAATCCTTTTCACGACCCGCGAATGCATCAACTGAGGC	Reverse mutagenesis primer for UPF1-Q766A mutation
oKB1438	GATGCATTCCAAGGTCGTGCGAAGGATTACATAATCTTATC	Forward mutagenesis primer for UPF1-E769A mutation
oKB1439	GATAAGATTATGTAATCCTTCGCACGACCTTGGAATGCATC	Reverse mutagenesis primer for UPF1-E769A mutation
oKB1440	TCTAAACGTGGGTCTAACCGCTGCCAAATATGGTCTAGT	Forward mutagenesis primer for UPF1-R801A mutation
oKB1441	ACTAGACCATATTTGGCAGCGGTTAGACCCACGTTTAGA	Reverse mutagenesis primer for UPF1-R801A mutation
oKB1442	AAATTTAGGACTGTGTTAATTAAGAAAAGTACTCAAGCTTCTGAGC	Forward mutagenesis primer for UPF1-DE572KK mutation
oKB1443	GCTCAGAAGCTTGAGTACTTTTCTTAATTAACACAGTCCTAAATTT	Reverse mutagenesis primer for UPF1-DE572KK mutation
oKB1444	AATTTAGGACTGTGTTAATTAACCAAAGTACTCAAGCTTCTGAGC	Forward mutagenesis primer for UPF1-DE572NQ mutation
oKB1445	GCTCAGAAGCTTGAGTACTTTGGTTAATTAACACAGTCCTAAATT	Reverse mutagenesis primer for UPF1-DE572NQ mutation
oKB1446	CTTGTTGGTGATCACCAGAAGCTGGGCCCAGTCATATTGG	Forward mutagenesis primer for UPF1-Q601K mutation
oKB1447	CCAATATGACTGGGCCCAGCTTCTGGTGATCACCAACAAG	Reverse mutagenesis primer for UPF1-Q601K mutation
oKB1448	GCCTCAGTTGATGCATTCAAGGGTCGTGAAAAGGATTAC	Forward mutagenesis primer for UPF1-Q766K mutation
oKB1449	GTAATCCTTTTCACGACCCTTGAATGCATCAACTGAGGC	Reverse mutagenesis primer for UPF1-Q766K mutation
oKB1450	GTTGATGCATTCCAAGGTCGTAAGAAGGATTACATAATCTTATC	Forward mutagenesis primer for UPF1-E769K mutation
oKB1451	GATAAGATTATGTAATCCTTCTTACGACCTTGGAATGCATCAAC	Reverse mutagenesis primer for UPF1-E769K mutation
oKB1466	GTATTGATTTTAAAGAAGATGGTAACATTCTTGGGCACAAATTGGA	Forward mutagenesis primer to mutate A 33 nt downstream of PTC in pKB674 to T
oKB1467	TCCAATTTGTGCCCAAGAATGTTACCATCTTCTTTAAAATCAATAC	Reverse mutagenesis primer to mutate A 33 nt downstream of PTC in pKB674 to T
oKB1516	GATACCCTTGTTAATAGAATCtagGAGTTAAAAGGTATTGATTTT	Forward mutagenesis primer for changing PTC in pKB674 to UAG
oKB1517	AAAATCAATACCTTTTAACTCctaGATTCTATTAACAAGGGTATC	Reverse mutagenesis primer for changing PTC in pKB674 to UAG
oKB1518	GATACCCTTGTTAATAGAATCtgaGAGTTAAAAGGTATTGATTTT	Forward mutagenesis primer for changing PTC in pKB674 to UGA
oKB1519	AAAATCAATACCTTTTAACTCtcaGATTCTATTAACAAGGGTATC	Reverse mutagenesis primer for changing PTC in pKB674 to UGA
oKB1562	ACCCTTGTTAATAGAATCTAATTAAAAGGTATTGATTTTAAA	Forward mutagenesis primer to delete 3 nt immediately downstream of PTC in pKB674
oKB1563	TTTAAAATCAATACCTTTTAATTAGATTCTATTAACAAGGGT	Reverse mutagenesis primer to delete 3 nt immediately downstream of PTC in pKB674
oKB1564	GATACCCTTGTTAATAGAATCTAAAAAGGTATTGATTTTAAAGAAGAT	Forward mutagenesis primer to delete 6 nt immediately downstream of PTC in pKB674
oKB1565	ATCTTCTTTAAAATCAATACCTTTTTAGATTCTATTAACAAGGGTATC	Reverse mutagenesis primer to delete 6 nt immediately downstream of PTC in pKB674
oKB1586	TCTAAGAGTTAAAAGGTATTGCTTTTAAAGAAGATGGAAACAT	Forward mutagenesis primer to mutate A 17 nt downstream of PTC in pKB674 to T
oKB1587	ATGTTTCCATCTTCTTTAAAAGCAATACCTTTTAACTCTTAGA	Reverse mutagenesis primer to mutate A 17 nt downstream of PTC in pKB674 to T
oKB1588	AAGAGTTAAAAGGTATTGATTATAAAGAAGATGGAAACATTCT	Forward mutagenesis primer to mutate T 20 nt downstream of PTC in pKB674 to A
oKB1589	AGAATGTTTCCATCTTCTTTATAATCAATACCTTTTAACTCTT	Reverse mutagenesis primer to mutate T 20 nt downstream of PTC in pKB674 to A
oKB1590	AAAGGTATTGATTTTAAAGAACATGGAAACATTCTTGGGCACA	Forward mutagenesis primer to mutate G 28 nt downstream of PTC in pKB674 to C
oKB1591	TGTGCCCAAGAATGTTTCCATGTTCTTTAAAATCAATACCTTT	Reverse mutagenesis primer to mutate G 28 nt downstream of PTC in pKB674 to C
oKB1592	AAGGTATTGATTTTAAAGAAGTTGGAAACATTCTTGGGCACAA	Forward mutagenesis primer to mutate A 29 nt downstream of PTC in pKB674 to T
oKB1593	TTGTGCCCAAGAATGTTTCCAACTTCTTTAAAATCAATACCTT	Reverse mutagenesis primer to mutate A 29 nt downstream of PTC in pKB674 to T
oKB1594	AGGTATTGATTTTAAAGAAGAAGGAAACATTCTTGGGCACAAA	Forward mutagenesis primer to mutate T 30 nt downstream of PTC in pKB674 to A
oKB1595	TTTGTGCCCAAGAATGTTTCCTTCTTCTTTAAAATCAATACCT	Reverse mutagenesis primer to mutate T 30 nt downstream of PTC in pKB674 to A
oKB1596	GGTATTGATTTTAAAGAAGATCGAAACATTCTTGGGCACAAAT	Forward mutagenesis primer to mutate G 31 nt downstream of PTC in pKB674 to C
oKB1597	ATTTGTGCCCAAGAATGTTTCGATCTTCTTTAAAATCAATACC	Reverse mutagenesis primer to mutate G 31 nt downstream of PTC in pKB674 to C
oKB1598	GTATTGATTTTAAAGAAGATGCAAACATTCTTGGGCACAAATT	Forward mutagenesis primer to mutate G 32 nt downstream of PTC in pKB674 to C
oKB1599	AATTTGTGCCCAAGAATGTTTGCATCTTCTTTAAAATCAATAC	Reverse mutagenesis primer to mutate G 32 nt downstream of PTC in pKB674 to C
oKB1600	ATTGATTTTAAAGAAGATGGATACATTCTTGGGCACAAATTGG	Forward mutagenesis primer to mutate A 34 nt downstream of PTC in pKB674 to T
oKB1601	CCAATTTGTGCCCAAGAATGTATCCATCTTCTTTAAAATCAAT	Reverse mutagenesis primer to mutate A 34 nt downstream of PTC in pKB674 to T
oKB1602	TTGATTTTAAAGAAGATGGAATCATTCTTGGGCACAAATTGGA	Forward mutagenesis primer to mutate A 35 nt downstream of PTC in pKB674 to T
oKB1603	TCCAATTTGTGCCCAAGAATGATTCCATCTTCTTTAAAATCAA	Reverse mutagenesis primer to mutate A 35 nt downstream of PTC in pKB674 to T
oKB1604	GATTTTAAAGAAGATGGAAACTTTCTTGGGCACAAATTGGAAT	Forward mutagenesis primer to mutate A 36 nt downstream of PTC in pKB674 to T
oKB1605	ATTCCAATTTGTGCCCAAGAAAGTTTCCATCTTCTTTAAAATC	Reverse mutagenesis primer to mutate A 36 nt downstream of PTC in pKB674 to T
oKB1606	ATTTTAAAGAAGATGGAAACAATCTTGGGCACAAATTGGAATA	Forward mutagenesis primer to mutate T 38 nt downstream of PTC in pKB674 to A
oKB1607	TATTCCAATTTGTGCCCAAGATTGTTTCCATCTTCTTTAAAAT	Reverse mutagenesis primer to mutate T 38 nt downstream of PTC in pKB674 to A
oKB1608	TTTTAAAGAAGATGGAAACATACTTGGGCACAAATTGGAATAC	Forward mutagenesis primer to mutate T 39 nt downstream of PTC in pKB674 to A
oKB1609	GTATTCCAATTTGTGCCCAAGTATGTTTCCATCTTCTTTAAAA	Reverse mutagenesis primer to mutate T 39 nt downstream of PTC in pKB674 to A
oKB1614	TACCCTTGTTAATAGAATCTAAGGTATTGATTTTAAAGAAGATG	Forward mutagenesis primer to delete 3 nt immediately downstream of PTC in pKB788 (9 nt deletion relative to pKB674)
oKB1615	CATCTTCTTTAAAATCAATACCTTAGATTCTATTAACAAGGGTA	Reverse mutagenesis primer to delete 3 nt immediately downstream of PTC in pKB788 (9 nt deletion relative to pKB674)
oKB1616	GATACCCTTGTTAATAGAATCTAAATTGATTTTAAAGAAGATGGAAAC	Forward mutagenesis primer to delete 6 nt immediately downstream of PTC in pKB788 (12 nt deletion relative to pKB674)
oKB1617	GTTTCCATCTTCTTTAAAATCAATTTAGATTCTATTAACAAGGGTATC	Reverse mutagenesis primer to delete 6 nt immediately downstream of PTC in pKB788 (12 nt deletion relative to pKB674)
oKB1624	CTGGAAGTACGAATCCGCCACTGCCTCCGCTTTGGTCAACCGGATCCCCGGGTTAATTAA	F2 primer for C-terminally tagging RPS13 using Longtine vectors
oKB1625	AATATACATATAAAATAATGAAATAAATGATTTAAACACTGAATTCGAGCTCGTTTAAAC	R1 primer for C-terminally tagging RPS13 using Longtine vectors
oKB1628	ACAAGGGTATCACCTTCAAACT	RT primer for primer extension of GFP-PTC67
oKB1659	ACCCTTGTTAATAGAATCTAAGATTTTAAAGAAGATGGAAAC	Forward mutagenesis primer to delete 3 nt immediately downstream of PTC in pKB808 (15 nt deletion relative to pKB674)
oKB1660	GTTTCCATCTTCTTTAAAATCTTAGATTCTATTAACAAGGGT	Reverse mutagenesis primer to delete 3 nt immediately downstream of PTC in pKB808 (15 nt deletion relative to pKB674)
oKB1661	GATACCCTTGTTAATAGAATCTAATTTAAAGAAGATGGAAACATT	Forward mutagenesis primer to delete 6 nt immediately downstream of PTC in pKB808 (18 nt deletion relative to pKB674)
oKB1662	AATGTTTCCATCTTCTTTAAATTAGATTCTATTAACAAGGGTATC	Reverse mutagenesis primer to delete 6 nt immediately downstream of PTC in pKB808 (18 nt deletion relative to pKB674)
